# Supplementary material
Source: PubMed Central journal article supplement (PMC7794192)
Supplement: ONCO-26-e99-s001.pdf [file ONCO-26-e99-s001.pdf]

Supplemental Figures for:  
Modified ypTNM Staging Classification for Gastric Cancer after Neoadjuvant Therapy: A Multi-institutional Study  
Chang-ming Huang et al.

Supplemental Fig. 1. Comparison of the AJCC 8th ypTNM staging system with the AJCC 7th pTNM staging system.

| ypTNM staging (AJCC 8th) |     |     |     |     | pTNM staging (AJCC 7th) |      |      |      |      |
|--------------------------|-----|-----|-----|-----|-------------------------|------|------|------|------|
|                          | N0  | N1  | N2  | N3  |                         | N0   | N1   | N2   | N3   |
| T1                       | I   | I   | II  | II  | T1                      | IA   | IB   | IIA  | IIB  |
| T2                       | I   | II  | II  | III | T2                      | IB   | IIA  | IIB  | IIIA |
| T3                       | II  | II  | III | III | T3                      | IIA  | IIB  | IIIA | IIIB |
| T4a                      | II  | III | III | III | T4a                     | IIB  | IIIA | IIIB | IIIC |
| T4b                      | III | III | III | III | T4b                     | IIIA | IIIB | IIIC | IIIC |

Supplemental Fig. 1. Comparison of the AJCC 8th ypTNM staging system with the AJCC 7th pTNM staging system.

Supplemental Fig. 2. Development cohort selection from the SEER registry.

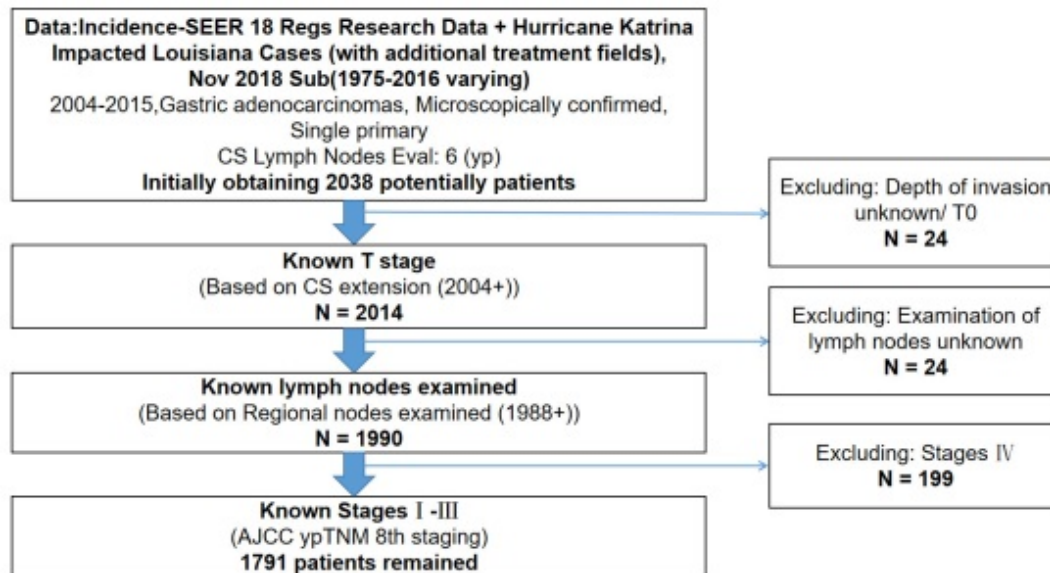

Supplemental Fig. 2. Development cohort selection from the SEER registry.

Supplemental Fig. 3. Kaplan-Meier survival curves of the different staging systems for patients after neoadjuvant therapy in the development cohort, stratified by adequate lymph nodes ( $\geq 15$ ): (A) the AJCC 8th ypTNM staging system and (B) the modified ypTNM staging system; inadequate lymph nodes ( $< 15$ ): (C) the AJCC 8th ypTNM staging system, and (D) the modified ypTNM staging system.

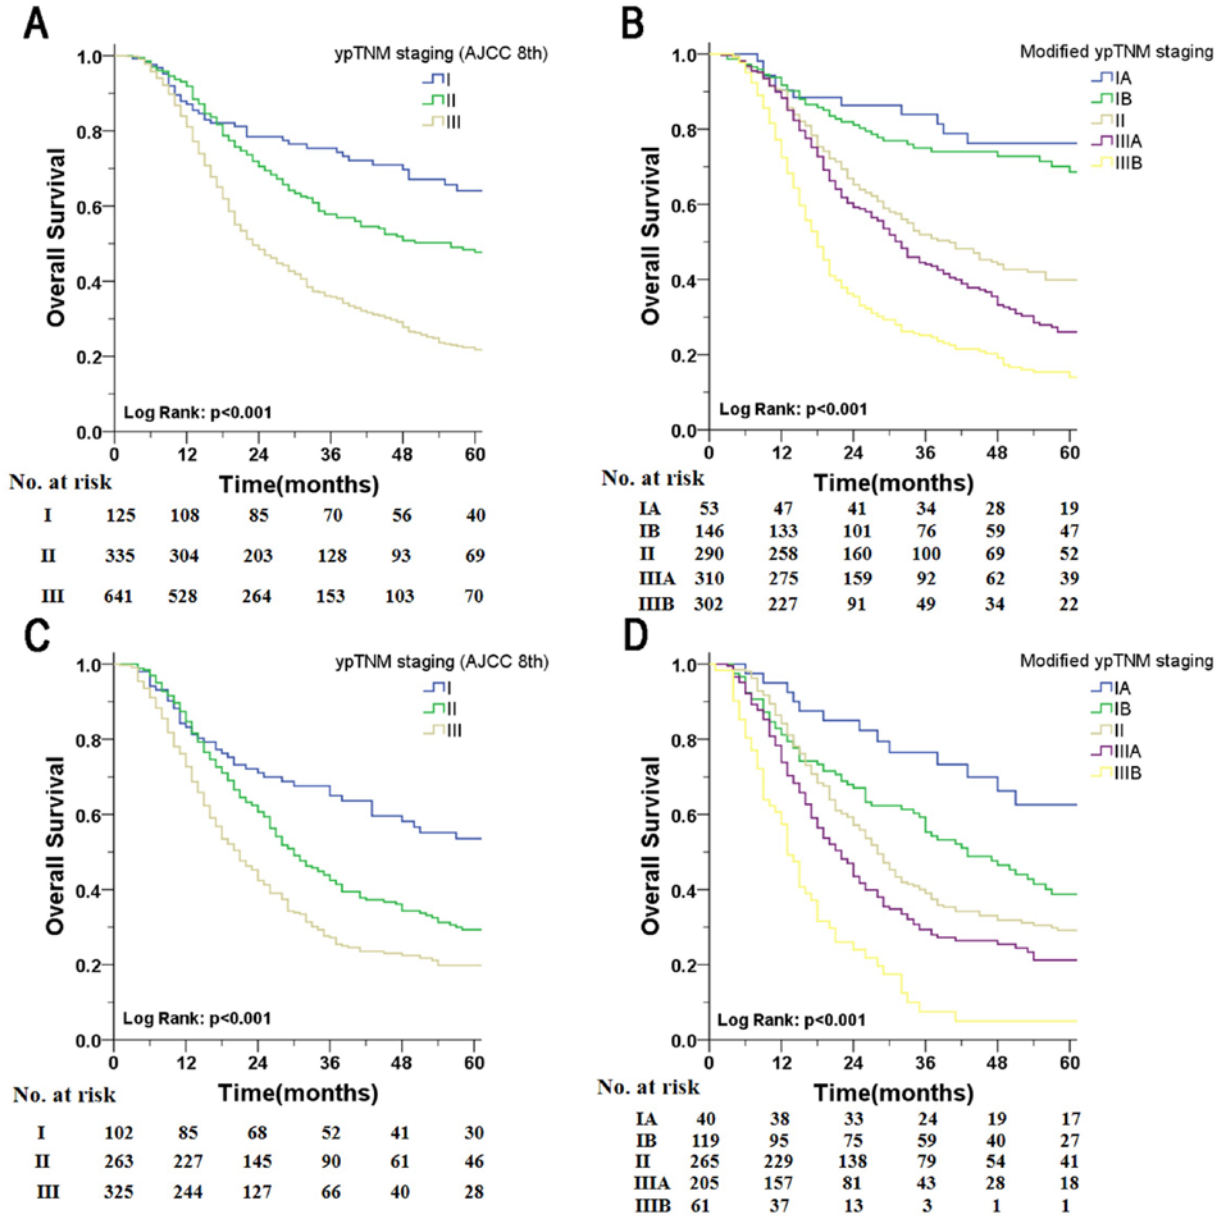

Supplemental Fig. 3. Kaplan-Meier survival curves of the different staging systems for patients after neoadjuvant therapy in the development cohort, stratified by adequate lymph nodes ( $\geq 15$ ): (A) the AJCC 8th ypTNM staging system and (B) the modified ypTNM staging system; inadequate lymph nodes ( $< 15$ ): (C) the AJCC 8th ypTNM staging system, and (D) the modified ypTNM staging system.

Supplemental Fig. 4. Kaplan-Meier survival curves of different staging systems for patients after neoadjuvant therapy, stratified by low grade: (A) the AJCC 8th ypTNM staging system and (B) the modified ypTNM staging system in the development cohort; (C) the AJCC 8th ypTNM staging system and (D) the modified ypTNM staging system in the validation cohort; high grade: (E) the AJCC 8th ypTNM staging system and (F) the modified ypTNM staging system in the development cohort; (G) the AJCC 8th ypTNM staging system and (H) the modified ypTNM staging system in the validation cohort.

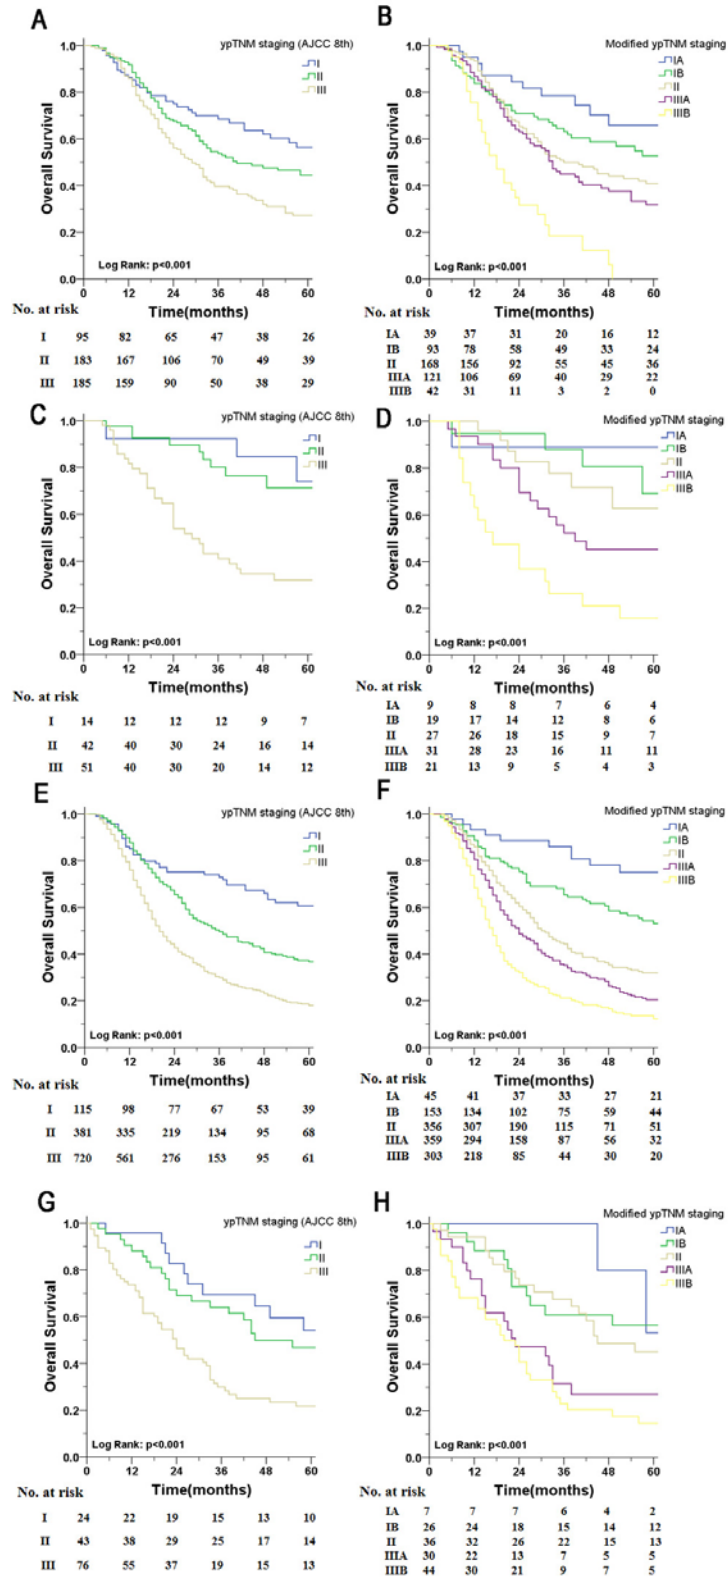

Supplemental Fig. 4. Kaplan-Meier survival curves of different staging systems for patients after neoadjuvant therapy, stratified by low grade: (A) the AJCC 8th ypTNM staging system and (B) the modified ypTNM staging system in the development cohort; (C) the AJCC 8th ypTNM staging system and (D) the modified ypTNM staging system in the validation cohort; high grade: (E) the AJCC 8th ypTNM staging system and (F) the modified ypTNM staging system in the development cohort; (G) the AJCC 8th ypTNM staging system and (H) the modified ypTNM staging system in the validation cohort.

Supplemental Fig. 5. Kaplan-Meier survival curves of the different staging systems for patients after neoadjuvant therapy, stratified by general type: (A) the AJCC 8th ypTNM staging system and (B) the modified ypTNM staging system in the development cohort; (C) the AJCC 8th ypTNM staging system and (D) the modified ypTNM staging system in the validation cohort; special type: (E) the AJCC 8th ypTNM staging system and (F) the modified ypTNM staging system in the development cohort; (G) the AJCC 8th ypTNM staging system and (H) the modified ypTNM staging system in the validation cohort.

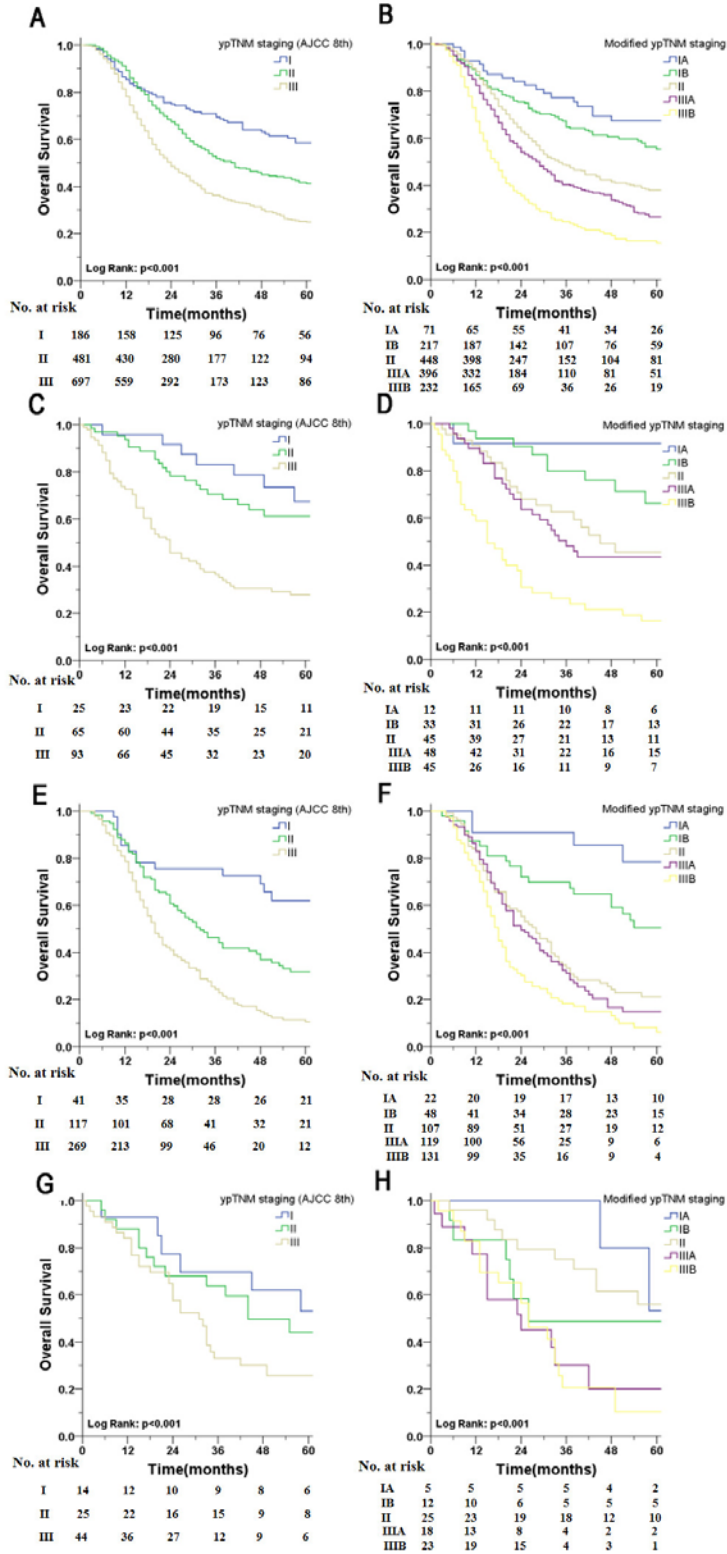

Supplemental Fig. 5. Kaplan-Meier survival curves of the different staging systems for patients after neoadjuvant therapy, stratified by general type: (A) the AJCC 8th ypTNM staging system and (B) the modified ypTNM staging system in the development cohort; (C) the AJCC 8th ypTNM staging system and (D) the modified ypTNM staging system in the validation cohort; special type: (E) the AJCC 8th ypTNM staging system and (F) the modified ypTNM staging system in the development cohort; (G) the AJCC 8th ypTNM staging system and (H) the modified ypTNM staging system in the validation cohort.

Supplemental Fig. 6. Time-dependent ROC curves for the AJCC 8th ypTNM staging system and the modified ypTNM staging system in the development cohort: (A) inadequate lymph nodes (<15) retrieved and (B) adequate lymph nodes ( $\geq 15$ ) retrieved. Decision curve analysis (DCA) for overall survival after surgery in the development cohort: (C) inadequate lymph nodes (<15) retrieved and (D) adequate lymph nodes ( $\geq 15$ ) retrieved.

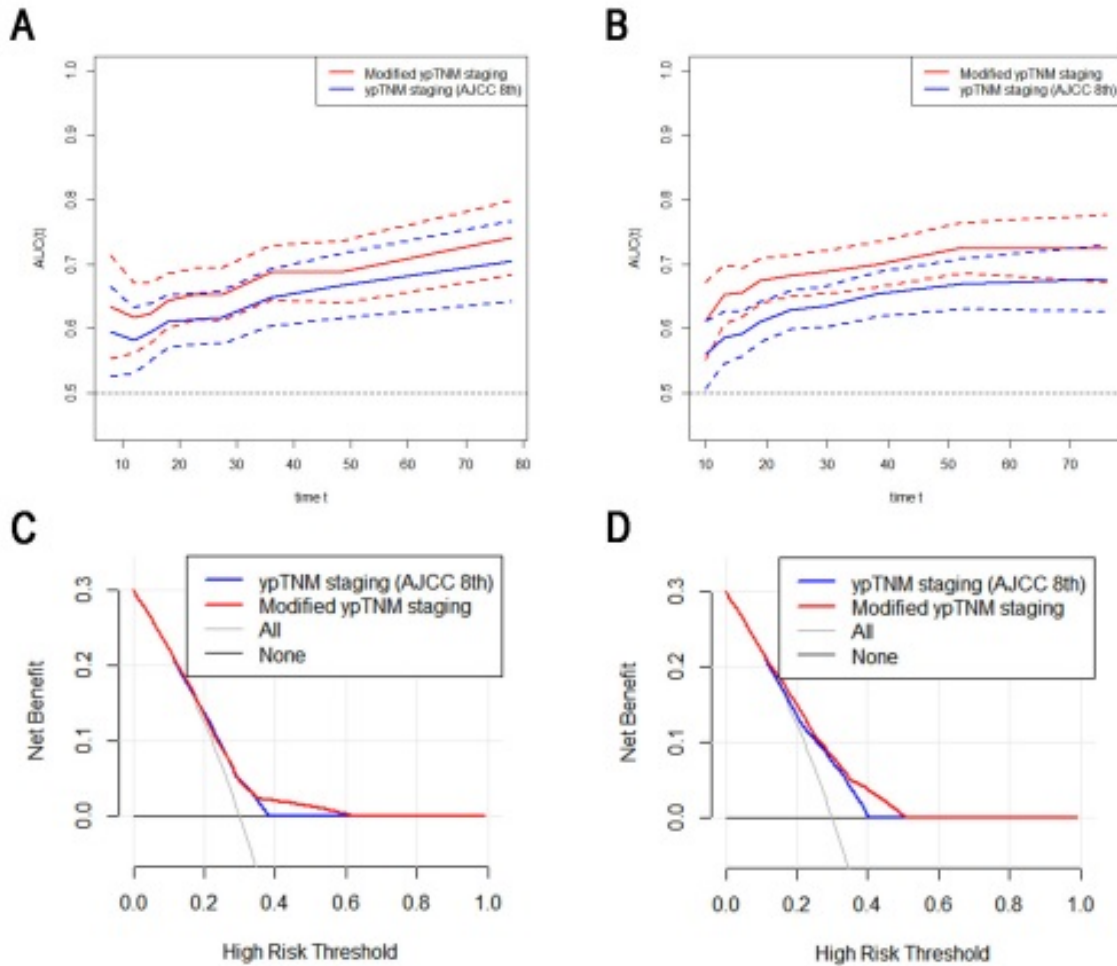

Supplemental Fig. 6. Time-dependent ROC curves for the AJCC 8th ypTNM staging system and the modified ypTNM staging system in the development cohort: (A) inadequate lymph nodes (<15) retrieved and (B) adequate lymph nodes ( $\geq 15$ ) retrieved. Decision curve analysis (DCA) for overall survival after surgery in the development cohort: (C) inadequate lymph nodes (<15) retrieved and (D) adequate lymph nodes ( $\geq 15$ ) retrieved.



Supplemental Fig. 7. Time-dependent ROC curves for the AJCC 8th ypTNM staging system and the modified ypTNM staging system for patients with low-grade tumors in (A) the development cohort and (B) the validation cohort. Decision curve analysis (DCA) for overall survival after surgery for patients with low-grade tumors in (C) the development cohort and (D) the validation cohort. Time-dependent ROC curves for the AJCC 8th ypTNM staging system and the modified ypTNM staging system for patients with high-grade tumors in (E) the development cohort and (F) the validation cohort. Decision curve analysis (DCA) for overall survival after surgery for patients with high-grade tumors in (G) the development cohort and (H) the validation cohort.

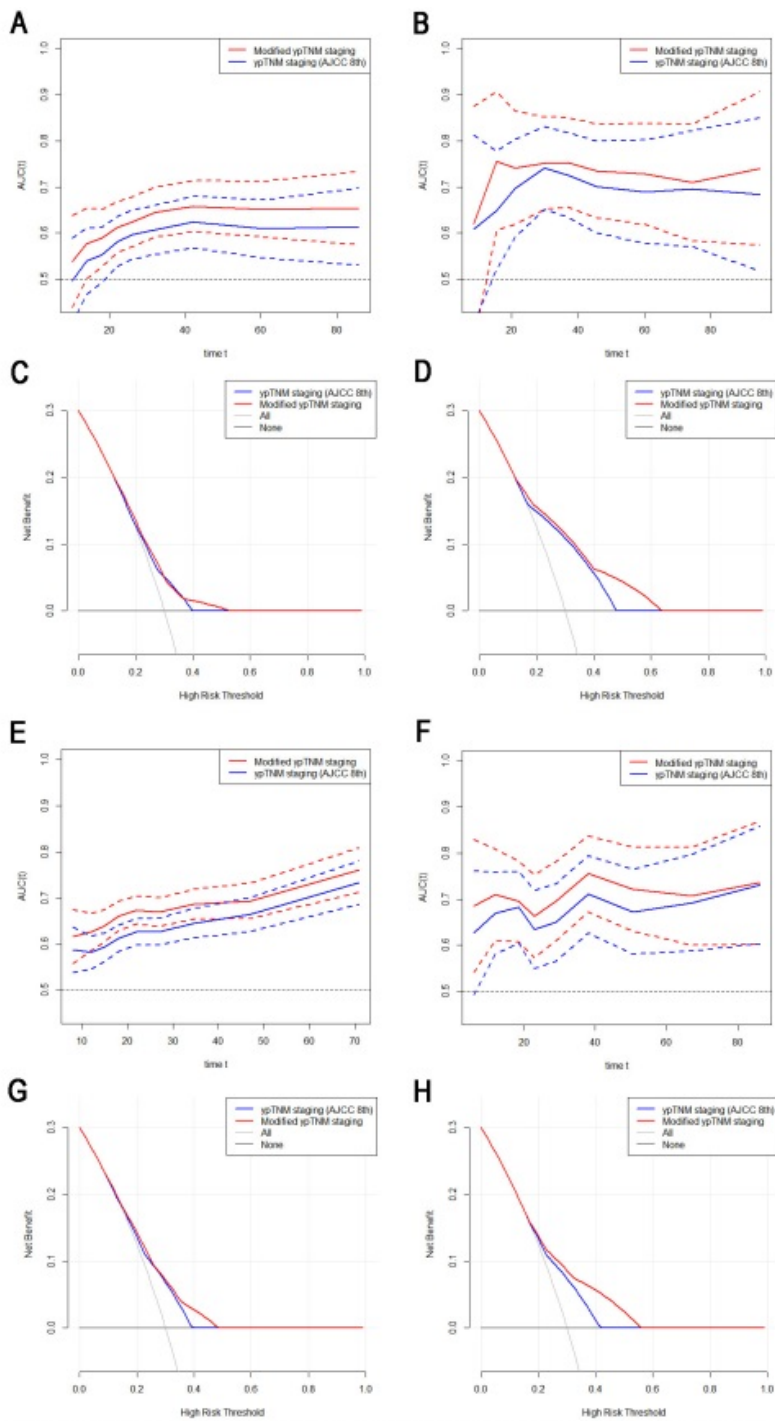

Supplemental Fig. 7. Time-dependent ROC curves for the AJCC 8th ypTNM staging system and the modified ypTNM staging system for patients with low-grade tumors in (A) the development cohort and (B) the validation cohort. Decision curve analysis (DCA) for overall survival after surgery for patients with low-grade tumors in (C) the development cohort and (D) the validation cohort. Time-dependent ROC curves for the AJCC 8th ypTNM staging system and the modified ypTNM staging system for patients with high-grade tumors in (E) the development cohort and (F) the validation cohort. Decision curve analysis (DCA) for overall survival after surgery for patients with high-grade tumors in (G) the development cohort and (H) the validation cohort.

Supplemental Fig. 8. Time-dependent ROC curves for the AJCC 8th ypTNM staging system and the modified ypTNM staging system for patients with general histological types in (A) the development cohort and (B) the validation cohort. Decision curve analysis (DCA) for overall survival after surgery for patients with general histological types in (C) the development cohort and (D) the validation cohort. Time-dependent ROC curves for the AJCC 8th ypTNM staging system and the modified ypTNM staging system for patients with special histological types in (E) the development cohort and (F) the validation cohort. Decision curve analysis (DCA) for overall survival after surgery for patients with special histological types in (G) the development cohort and (H) the validation cohort.

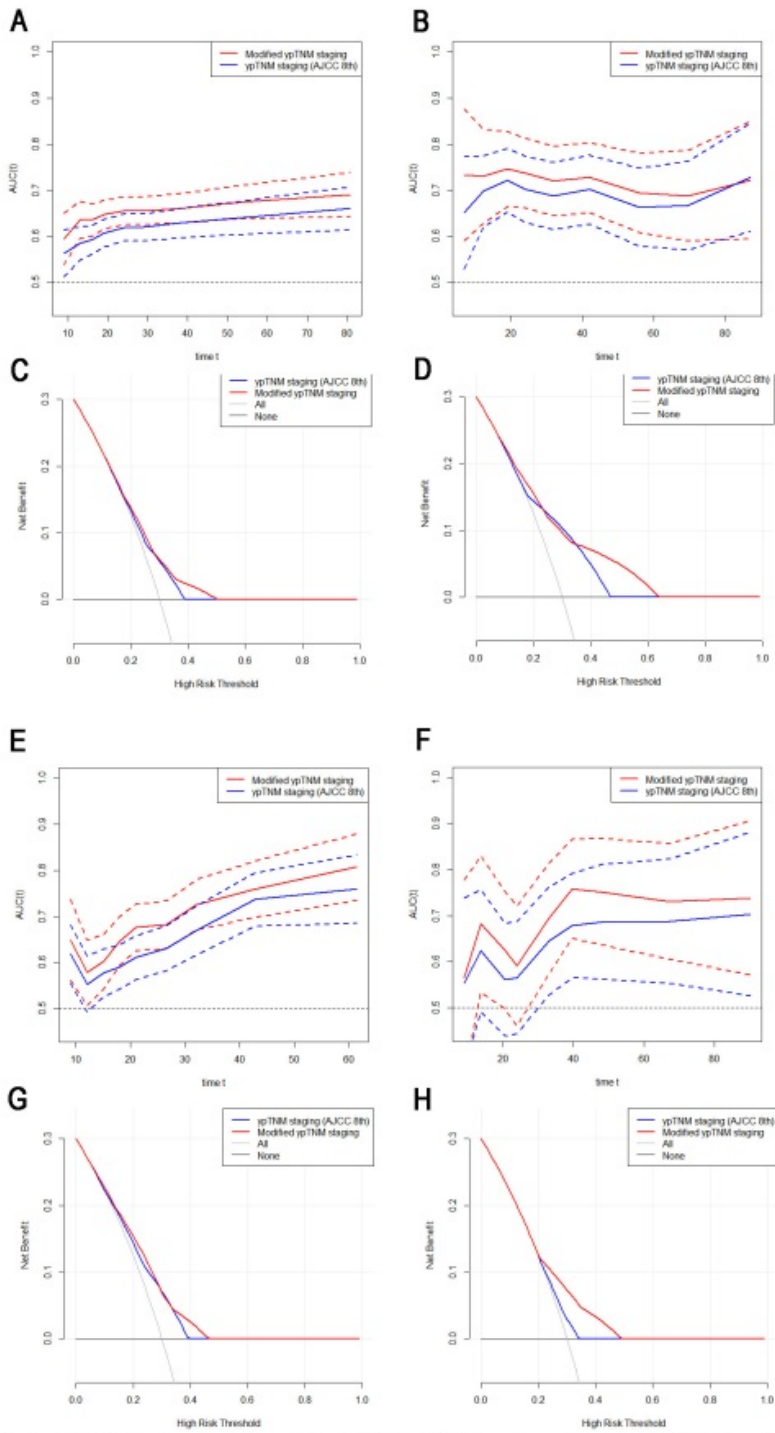

Supplemental Fig. 8. Time-dependent ROC curves for the AJCC 8th ypTNM staging system and the modified ypTNM staging system for patients with general histological types in (A) the development cohort and (B) the validation cohort. Decision curve analysis (DCA) for overall survival after surgery for patients with general histological types in (C) the development cohort and (D) the validation cohort. Time-dependent ROC curves for the AJCC 8th ypTNM staging system and the modified ypTNM staging system for patients with special histological types in (E) the development cohort and (F) the validation cohort. Decision curve analysis (DCA) for overall survival after surgery for patients with special histological types in (G) the development cohort and (H) the validation cohort.

Supplemental Fig. 9. Kaplan-Meier survival curves for patients after neoadjuvant therapy in the development cohort, stratified by (A) ypT stage and (B) ypN stage; Kaplan-Meier survival curves for patients after neoadjuvant therapy in the validation cohort, stratified by (C) ypT stage and (D) ypN stage.

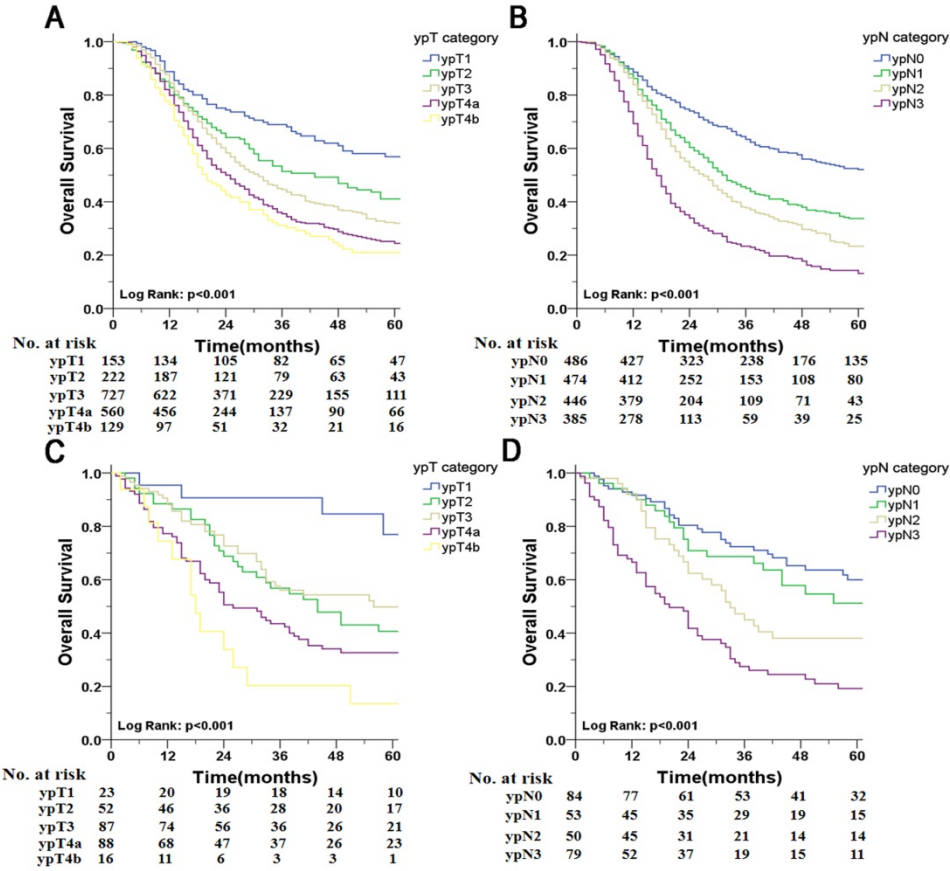

Supplemental Fig. 9. Kaplan-Meier survival curves for patients after neoadjuvant therapy in the development cohort, stratified by (A) ypT stage and (B) ypN stage; Kaplan-Meier survival curves for patients after neoadjuvant therapy in the validation cohort, stratified by (C) ypT stage and (D) ypN stage.

Supplemental Fig. 10. Kaplan-Meier survival curves for patients after neoadjuvant therapy according to the year of operation (A) in the development cohort, and (B) in the validation cohort.

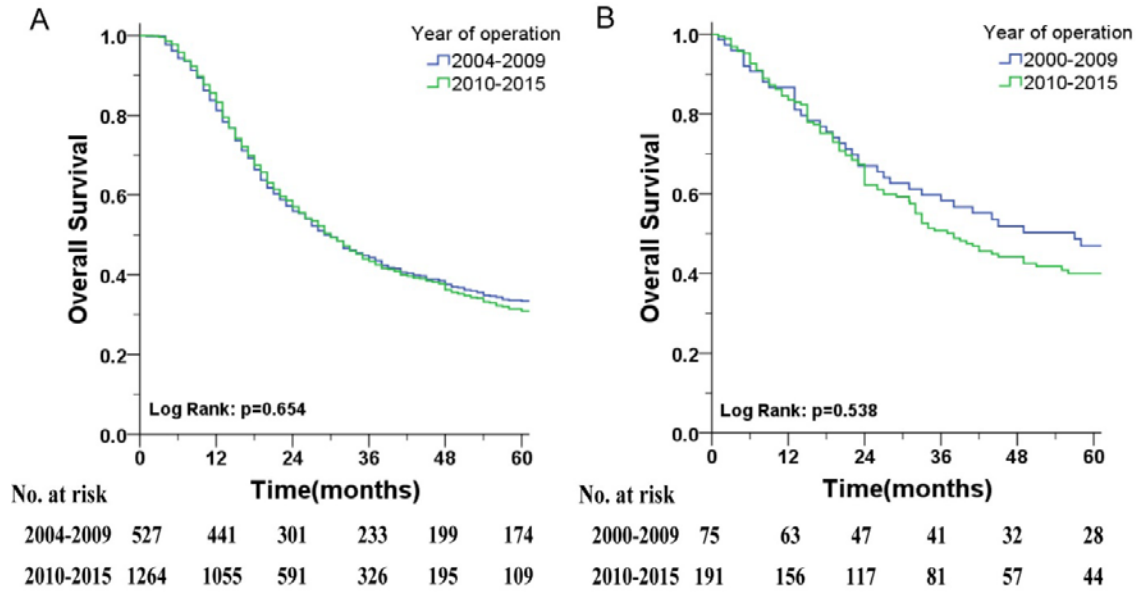

Supplemental Fig. 10. Kaplan-Meier survival curves for patients after neoadjuvant therapy according to the year of operation (A) in the development cohort, and (B) in the validation cohort.

Supplemental Fig. 11. Kaplan-Meier survival curves for patients after neoadjuvant therapy according to the treatment center.

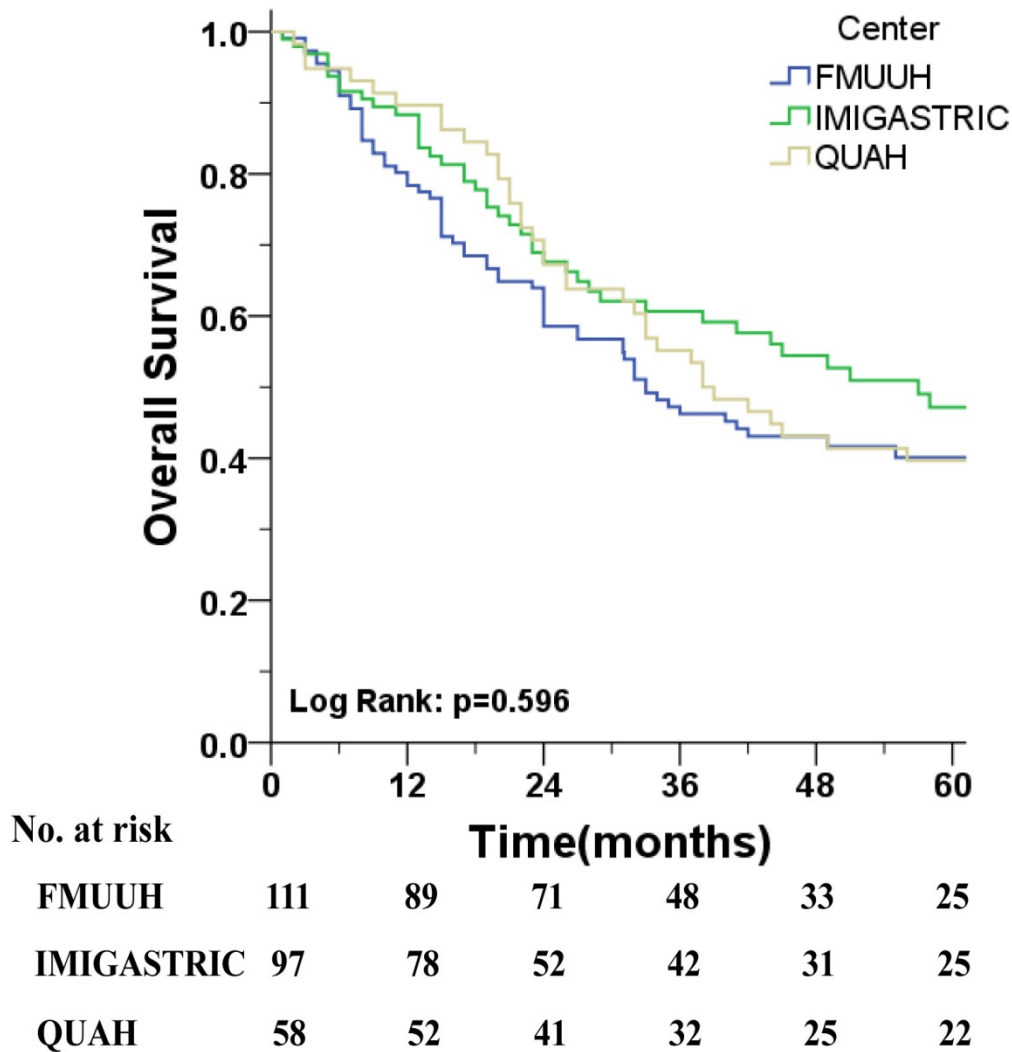

Supplemental Fig. 11. Kaplan-Meier survival curves for patients after neoadjuvant therapy according to the treatment center.
