# Supplementary material
Source: PubMed Central journal article supplement (PMC7794192)
Supplement: ONCO-26-e99-s002.pdf [file ONCO-26-e99-s002.pdf]

Supplemental Tables for:  
Modified ypTNM Staging Classification for Gastric Cancer after Neoadjuvant Therapy: A Multi-institutional Study  
Chang-ming Huang et al.

Supplemental Table 1. Five-year Overall Survival Probabilities for Different ypTNM Subgroups in the Development Cohort and the Validation Cohort.

| Development Cohort |                  |                  |                  |                  | Validation cohort |                 |                 |                 |                 |
|--------------------|------------------|------------------|------------------|------------------|-------------------|-----------------|-----------------|-----------------|-----------------|
| 5y-OS              | N0               | N1               | N2               | N3               | 5y-OS             | N0              | N1              | N2              | N3              |
| T1                 | 69.9%<br>(n=93)  | 42.4%<br>(n=42)  | 19.3%<br>(n=13)  | 20.0%<br>(n=5)   | T1                | 79.1%<br>(n=17) | 100.0%<br>(n=3) | -<br>(n=2)      | 100.0%<br>(n=1) |
| T2                 | 54.9%<br>(n=92)  | 32.0%<br>(n=70)  | 29.7%<br>(n=43)  | 26.1%<br>(n=17)  | T2                | 46.1%<br>(n=19) | 16.1%<br>(n=12) | 54.5%<br>(n=11) | 38.9%<br>(n=10) |
| T3                 | 54.3%<br>(n=173) | 32.6%<br>(n=189) | 22.8%<br>(n=209) | 16.2%<br>(n=156) | T3                | 78.3%<br>(n=26) | 65.7%<br>(n=19) | 25.0%<br>(n=17) | 25.3%<br>(n=25) |
| T4a                | 36.5%<br>(n=105) | 33.7%<br>(n=149) | 24.4%<br>(n=146) | 10.9%<br>(n=160) | T4a               | 41.3%<br>(n=19) | 58.5%<br>(n=17) | 36.4%<br>(n=16) | 13.6%<br>(n=36) |
| T4b                | 26.2%<br>(n=23)  | 37.5%<br>(n=24)  | 23.1%<br>(n=35)  | 15.7%<br>(n=47)  | T4b               | 33.3%<br>(n=3)  | -<br>(n=2)      | 25.0%<br>(n=4)  | 0.0%<br>(n=7)   |

In the validation cohort, one of two patients with T1N2 disease and one of two patients with T4bN1 disease were censored. Therefore, overall survival was not calculated. OS, overall survival.

Supplemental Table 2. Univariate Analyses for Overall Survival in the Development and the Validation Cohort.

| Variable                  | Development cohort (n=1791) |           |        | Validation cohort (n=266) |            |       |
|---------------------------|-----------------------------|-----------|--------|---------------------------|------------|-------|
|                           | HR                          | 95%CI     | p      | HR                        | 95%CI      | p     |
| <b>Region</b>             |                             |           |        |                           |            |       |
| China                     | NA                          |           |        | REF                       |            |       |
| Italy                     | NA                          |           |        | 0.85                      | 0.60-1.21  | 0.358 |
| <b>Year of operation</b>  |                             |           |        |                           |            |       |
| 2004-2009                 | REF                         |           |        | REF                       |            |       |
| 2010-2015                 | 1.03                        | 0.91-1.17 |        | 1.12                      | 0.78-1.61  | 0.542 |
| <b>Center</b>             |                             |           |        |                           |            |       |
| FMUUH                     | NA                          |           |        | REF                       |            |       |
| IMIGASTRIC                | NA                          |           |        | 0.82                      | 0.56-1.20  | 0.314 |
| QUAH                      | NA                          |           |        | 0.92                      | 0.61-1.38  | 0.687 |
| <b>Age</b>                |                             |           |        |                           |            |       |
| <45                       | REF                         |           |        | REF                       |            |       |
| 45-59                     | 1.06                        | 0.85-1.32 | 0.596  | 0.73                      | 0.44-1.21  | 0.223 |
| 60-75                     | 1.11                        | 0.90-1.38 | 0.323  | 0.82                      | 0.50-1.35  | 0.439 |
| >75                       | 1.5                         | 1.15-1.95 | 0.003  | 0.68                      | 0.30-1.55  | 0.359 |
| <b>Race</b>               |                             |           |        |                           |            |       |
| White                     | REF                         |           |        |                           |            |       |
| Black                     | 0.84                        | 0.68-1.04 | 0.103  |                           |            |       |
| Others*                   | 0.83                        | 0.69-0.99 | 0.04   | REF                       |            |       |
| Unknown                   | 0.5                         | 0.07-3.54 | 0.486  | 0.85                      | 0.60-1.21  | 0.358 |
| <b>Sex</b>                |                             |           |        |                           |            |       |
| Female                    | REF                         |           |        | REF                       |            |       |
| Male                      | 1.05                        | 0.91-1.20 | 0.499  | 0.93                      | 0.63-1.35  | 0.686 |
| <b>Site</b>               |                             |           |        |                           |            |       |
| Upper                     | REF                         |           |        | REF                       |            |       |
| Middle                    | 0.77                        | 0.65-0.91 | 0.003  | 0.66                      | 0.45-0.96  | 0.029 |
| Lower                     | 0.88                        | 0.72-1.06 | 0.175  | 0.63                      | 0.38-1.05  | 0.077 |
| Overlapping               | 1.06                        | 0.85-1.33 | 0.602  | 1.19                      | 0.59-2.38  | 0.627 |
| NOS                       | 1.28                        | 0.98-1.67 | 0.068  | 1.19                      | 0.29-4.86  | 0.808 |
| <b>Histological type</b>  |                             |           |        |                           |            |       |
| General types             | REF                         |           |        | REF                       |            |       |
| Special types             | 1.31                        | 1.15-1.50 | <0.001 | 1.14                      | 0.81-1.60  | 0.46  |
| <b>Size</b>               |                             |           |        |                           |            |       |
| ≤2cm                      | REF                         |           |        | REF                       |            |       |
| >2cm, ≤5cm                | 1.35                        | 1.10-1.64 | 0.003  | 1.6                       | 0.73-3.50  | 0.244 |
| >5cm                      | 1.49                        | 1.22-1.83 | <0.001 | 2.05                      | 0.94-4.47  | 0.07  |
| Linitis plastica          | 1.75                        | 1.16-2.65 | 0.008  | 4.37                      | 1.38-13.81 | 0.012 |
| Unknown                   | 1.23                        | 0.98-1.55 | 0.073  | 2.73                      | 0.96-7.79  | 0.061 |
| <b>Surgical procedure</b> |                             |           |        |                           |            |       |
| Partial gastrectomy       | REF                         |           |        | REF                       |            |       |
| Total gastrectomy         | 1.28                        | 1.12-1.46 | <0.001 | 1.09                      | 0.77-1.54  | 0.632 |
| Gastrectomy, NOS          | 1.39                        | 1.18-1.65 | <0.001 |                           |            |       |
| <b>Grade</b>              |                             |           |        |                           |            |       |

|                                 |      |           |        |      |            |        |
|---------------------------------|------|-----------|--------|------|------------|--------|
| Low                             | REF  |           |        | REF  |            |        |
| High                            | 1.38 | 1.20-1.59 | <0.001 | 1.6  | 1.12-2.27  | 0.009  |
| Gx                              | 1.04 | 0.79-1.38 | 0.758  | 1.63 | 0.80-3.32  | 0.183  |
| <b>ypT category</b>             |      |           |        |      |            |        |
| T1                              | REF  |           |        | REF  |            |        |
| T2                              | 1.57 | 1.15-2.13 | 0.004  | 2.72 | 1.13-6.51  | 0.025  |
| T3                              | 1.96 | 1.51-2.56 | <0.001 | 2.2  | 0.93-5.21  | 0.073  |
| T4a                             | 2.5  | 1.92-3.27 | <0.001 | 3.74 | 1.61-8.67  | 0.002  |
| T4b                             | 2.92 | 2.13-4.02 | <0.001 | 6.36 | 2.41-16.82 | <0.001 |
| <b>ypN category</b>             |      |           |        |      |            |        |
| N0                              | REF  |           |        | REF  |            |        |
| N1                              | 1.67 | 1.40-1.99 | <0.001 | 1.32 | 0.77-2.25  | 0.315  |
| N2                              | 2.09 | 1.75-2.49 | <0.001 | 1.95 | 1.18-3.22  | 0.009  |
| N3                              | 3.3  | 2.77-3.94 | <0.001 | 3.48 | 2.26-5.35  | <0.001 |
| <b>LN<sub>s</sub> examined</b>  |      |           |        |      |            |        |
| <15                             | REF  |           |        | REF  |            |        |
| ≥15                             | 0.83 | 0.74-0.94 | 0.002  | 1.07 | 0.58-1.97  | 0.84   |
| <b>ypTNM staging (AJCC 8th)</b> |      |           |        |      |            |        |
| I                               | REF  |           |        | REF  |            |        |
| II                              | 1.68 | 1.33-2.13 | <0.001 | 1.26 | 0.69-2.31  | 0.443  |
| III                             | 2.87 | 2.30-3.59 | <0.001 | 2.86 | 1.66-4.95  | <0.001 |
| <b>Modified ypTNM staging</b>   |      |           |        |      |            |        |
| IA                              | REF  |           |        | REF  |            |        |
| IB                              | 1.74 | 1.15-2.66 | 0.009  | 1.4  | 0.51-3.84  | 0.511  |
| II                              | 2.98 | 2.01-4.42 | <0.001 | 2.11 | 0.82-5.43  | 0.119  |
| IIIA                            | 3.83 | 2.58-5.67 | <0.001 | 3.17 | 1.25-8.05  | 0.015  |
| IIIB                            | 6.2  | 4.17-9.22 | <0.001 | 5.96 | 2.38-14.94 | <0.001 |
| <b>Adjuvant radiotherapy</b>    |      |           |        |      |            |        |
| None                            | REF  |           |        | NA   |            |        |
| Yes                             | 1.12 | 0.96-1.32 | 0.159  | NA   |            |        |
| <b>Adjuvant chemotherapy†</b>   |      |           |        |      |            |        |
| None                            | NA   |           |        |      |            |        |
| Yes                             | NA   |           |        | 0.94 | 0.67-1.31  | 0.719  |

Abbreviations: NOS, not otherwise specified; LN<sub>s</sub>, Lymph nodes; Gx, Grade can't evaluate; NA, Not applicable.

Others\*, American Indian/AK Native, Asian/Pacific Islander.

†In the SEER database, category record "Chemotherapy recode (yes, no/unk)" does not distinguish between preoperative and postoperative chemotherapy in detail.

Supplemental Table 3. Time-Dependent Univariate Cox Analysis of the Staging System for Patients with Gastric Cancer after Neoadjuvant Therapy.

| Variable                        | Development cohort       |            |        | Validation cohort       |            |        |
|---------------------------------|--------------------------|------------|--------|-------------------------|------------|--------|
|                                 | HR                       | 95%CI      | p      | HR                      | 95%CI      | p      |
|                                 | <b>Baseline (N=1791)</b> |            |        | <b>Baseline (N=266)</b> |            |        |
| <b>ypTNM staging (AJCC 8th)</b> |                          |            |        |                         |            |        |
| I                               | REF                      |            | <0.001 | REF                     |            | <0.001 |
| II                              | 1.68                     | 1.33-2.13  | <0.001 | 1.26                    | 0.69-2.31  | 0.443  |
| III                             | 2.87                     | 2.30-3.59  | <0.001 | 2.86                    | 1.66-4.95  | <0.001 |
| <b>Modified ypTNM staging</b>   |                          |            |        |                         |            |        |
| IA                              | REF                      |            | <0.001 | REF                     |            | <0.001 |
| IB                              | 1.74                     | 1.15-2.66  | 0.009  | 1.40                    | 0.51-3.84  | 0.511  |
| II                              | 2.98                     | 2.01-4.42  | <0.001 | 2.11                    | 0.82-5.43  | 0.119  |
| IIIA                            | 3.83                     | 2.58-5.67  | <0.001 | 3.17                    | 1.25-8.05  | 0.015  |
| IIIB                            | 6.20                     | 4.17-9.22  | <0.001 | 5.96                    | 2.38-14.94 | <0.001 |
|                                 | <b>1 Year (N=1440)</b>   |            |        | <b>1 Year (N=215)</b>   |            |        |
| <b>ypTNM staging (AJCC 8th)</b> |                          |            |        |                         |            |        |
| I                               | REF                      |            | <0.001 | REF                     |            | 0.001  |
| II                              | 2.26                     | 1.69-3.02  | <0.001 | 1.25                    | 0.65-2.39  | 0.507  |
| III                             | 3.69                     | 2.78-4.88  | <0.001 | 2.50                    | 1.37-4.55  | 0.003  |
| <b>Modified ypTNM staging</b>   |                          |            |        |                         |            |        |
| IA                              | REF                      |            | <0.001 | REF                     |            | <0.001 |
| IB                              | 1.70                     | 1.04-2.77  | 0.035  | 1.36                    | 0.44-4.24  | 0.592  |
| II                              | 3.49                     | 2.21-5.51  | <0.001 | 2.39                    | 0.84-6.83  | 0.104  |
| IIIA                            | 4.38                     | 2.77-6.91  | <0.001 | 3.44                    | 1.21-9.78  | 0.020  |
| IIIB                            | 6.71                     | 4.22-10.67 | <0.001 | 5.47                    | 1.93-15.5  | 0.001  |
|                                 | <b>2 Year (N=856)</b>    |            |        | <b>2 Year (N=154)</b>   |            |        |
| <b>ypTNM staging (AJCC 8th)</b> |                          |            |        |                         |            |        |
| I                               | REF                      |            | <0.001 | REF                     |            | 0.090  |
| II                              | 2.29                     | 1.57-3.36  | <0.001 | 0.93                    | 0.42-2.06  | 0.866  |
| III                             | 3.44                     | 2.38-4.99  | <0.001 | 1.75                    | 0.85-3.63  | 0.130  |
| <b>Modified ypTNM staging</b>   |                          |            |        |                         |            |        |
| IA                              | REF                      |            | <0.001 | REF                     |            | 0.017  |
| IB                              | 1.59                     | 0.88-2.88  | 0.125  | 0.94                    | 0.28-3.16  | 0.925  |
| II                              | 3.05                     | 1.75-5.30  | <0.001 | 1.39                    | 0.46-4.22  | 0.559  |
| IIIA                            | 3.89                     | 2.23-6.78  | <0.001 | 1.81                    | 0.59-5.57  | 0.299  |
| IIIB                            | 5.08                     | 2.83-9.11  | <0.001 | 3.52                    | 1.17-10.61 | 0.026  |
|                                 | <b>3 Year (N=542)</b>    |            |        | <b>3 Year (N=120)</b>   |            |        |
| <b>ypTNM staging (AJCC 8th)</b> |                          |            |        |                         |            |        |
| I                               | REF                      |            | <0.001 | REF                     |            | 0.978  |
| II                              | 1.59                     | 1.00-2.52  | 0.050  | 0.99                    | 0.38-2.56  | 0.986  |
| III                             | 2.80                     | 1.80-4.36  | <0.001 | 1.08                    | 0.41-2.85  | 0.874  |
| <b>Modified ypTNM staging</b>   |                          |            |        |                         |            |        |
| IA                              | REF                      |            | <0.001 | REF                     |            | 0.262  |
| IB                              | 1.43                     | 0.70-2.93  | 0.324  | 0.45                    | 0.11-1.82  | 0.261  |
| II                              | 2.28                     | 1.17-4.48  | 0.016  | 1.16                    | 0.37-3.63  | 0.805  |
| IIIA                            | 3.50                     | 1.79-6.86  | <0.001 | 0.63                    | 0.16-2.52  | 0.512  |
| IIIB                            | 4.54                     | 2.20-9.37  | <0.001 | 1.67                    | 0.47-5.93  | 0.425  |
|                                 | <b>4 Year (N=376)</b>    |            |        | <b>4 Year (N=86)</b>    |            |        |

|                                 |      |                       |        |      |                      |       |
|---------------------------------|------|-----------------------|--------|------|----------------------|-------|
| <b>ypTNM staging (AJCC 8th)</b> |      |                       |        |      |                      |       |
| I                               | REF  |                       | <0.001 | REF  |                      | 0.748 |
| II                              | 1.49 | 0.81-2.74             | 0.196  | 0.66 | 0.19-2.27            | 0.504 |
| III                             | 3.00 | 1.69-5.34             | <0.001 | 0.65 | 0.17-2.44            | 0.523 |
| <b>Modified ypTNM staging</b>   |      |                       |        |      |                      |       |
| IA                              | REF  |                       | <0.001 | REF  |                      | 0.246 |
| IB                              | 2.46 | 0.84-7.19             | 0.101  | 0.36 | 0.07-1.87            | 0.223 |
| II                              | 3.28 | 1.16-9.33             | 0.026  | 0.56 | 0.13-2.47            | 0.444 |
| IIIA                            | 5.84 | 2.06-16.55            | 0.001  | 0.20 | 0.02-1.96            | 0.168 |
| IIIB                            | 8.08 | 2.7-24.21             | <0.001 | 1.48 | 0.33-6.64            | 0.605 |
|                                 |      | <b>5 Year (N=275)</b> |        |      | <b>5 Year (N=70)</b> |       |
| <b>ypTNM staging (AJCC 8th)</b> |      |                       |        |      |                      |       |
| I                               | REF  |                       | 0.003  | REF  |                      | 0.809 |
| II                              | 1.81 | 0.81-4.08             | 0.151  | 0.97 | 0.16-5.82            | 0.973 |
| III                             | 3.47 | 1.58-7.63             | 0.002  | 0.48 | 0.04-5.37            | 0.551 |
| <b>Modified ypTNM staging</b>   |      |                       |        |      |                      |       |
| IA                              | REF  |                       | 0.009  | REF  |                      | 0.552 |
| IB                              | 1.87 | 0.52-6.71             | 0.338  | 0.11 | 0.01-1.45            | 0.093 |
| II                              | 3.19 | 0.95-10.77            | 0.061  | 0.32 | 0.04-2.45            | 0.271 |
| IIIA                            | 4.67 | 1.36-16.04            | 0.014  | 0.33 | 0.03-3.73            | 0.374 |
| IIIB                            | 6.57 | 1.74-24.83            | 0.005  | 0.57 | 0.05-6.36            | 0.652 |

Supplemental Table 4. Comparison of the Prognostic Performances of the AJCC 8th ypTNM Staging System and the Modified ypTNM Staging System for Patients with Inadequate Lymph Nodes (<15) Retrieved and Adequate Lymph Nodes (≥15) Retrieved in the Development Cohort.

| Variable                                         | ypTNM staging (AJCC 8th) | Modified ypTNM staging | p value* |
|--------------------------------------------------|--------------------------|------------------------|----------|
| <b>Inadequate Lymph Nodes (&lt;15) Retrieved</b> |                          |                        |          |
| Harrell's C index*                               | 0.588 (0.561-0.615)      | 0.611 (0.583-0.639)    | 0.006    |
| AIC†                                             | 5371.33                  | 5345.04                | <0.001   |
| Likelihood ratio chi-square‡                     | 51.05                    | 103.69                 | <0.001   |
| Mean difference in BIC with 95%CI limits#        | 17.82 (-6.64, 39.86)     |                        |          |
| NRI with 95%CI limits                            | 14.84% (-1.95%, 32.43%)  |                        | 0.082    |
| IDI with 95%CI limits                            | 0.028 (-0.002, 0.053)    |                        | 0.070    |
| <b>Adequate Lymph Nodes (≥15) Retrieved</b>      |                          |                        |          |
| Harrell's C index*                               | 0.596 (0.575-0.618)      | 0.641 (0.618-0.665)    | <0.001   |
| AIC†                                             | 7984.25                  | 7917.07                | <0.001   |
| Likelihood ratio chi-square‡                     | 81.34                    | 174.86                 | <0.001   |
| Mean difference in BIC with 95%CI limits#        | 59.50 (25.27, 84.42)     |                        |          |
| NRI with 95%CI limits                            | 37.35% (21.12%, 56.60%)  |                        | <0.001   |
| IDI with 95%CI limits                            | 0.050 (0.022, 0.078)     |                        | <0.001   |

Abbreviations: AIC, Akaike information criterion; BIC, Bayesian information criteria; CI, Confidence interval; NRI, Net reclassification Index; IDI, Integrated discrimination improvement index.

\* A higher Harrell's C index indicates higher discriminative ability

† Smaller AIC values indicate better optimistic prognostic stratification.

‡ A higher likelihood ratio chi-square score indicates better homogeneity.

# The BIC was used to assess the overall prognostic performance of different prognostic systems via bootstrap-resampling analysis

ψ NRI and IDI quantify the improvement by the new staging system in predicting the patient's 5-year survival.

Supplemental Table 5. Comparison of the Prognostic Performance of the AJCC 8th ypTNM Staging System and the Modified ypTNM Staging System for Patients with Low-Grade and High-Grade Tumors.

| Variable                                  | ypTNM staging (AJCC 8th) | Modified ypTNM staging | p value* |
|-------------------------------------------|--------------------------|------------------------|----------|
| <b>Development cohort</b>                 |                          |                        |          |
| <b>Low grade</b>                          |                          |                        |          |
| Harrell's C index*                        | 0.567 (0.530-0.604)      | 0.590 (0.551-0.629)    | 0.051    |
| AIC†                                      | 2765.73                  | 2748.39                | <0.001   |
| Likelihood ratio chi-square‡              | 20.79                    | 42.13                  | <0.001   |
| Mean difference in BIC with 95%CI limits‡ | 10.85 (-10.21, 24.78)    |                        |          |
| NRI with 95%CI limits                     | 14.84% (-2.00%, 42.93%)  |                        | 0.096    |
| IDI with 95%CI limits                     | 0.034 (0.006, 0.054)     |                        | <0.001   |
| <b>High grade</b>                         |                          |                        |          |
| Harrell's C index*                        | 0.590 (0.571-0.610)      | 0.622 (0.601-0.643)    | <0.001   |
| AIC†                                      | 9998.34                  | 9953.35                | <0.001   |
| Likelihood ratio chi-square‡              | 107.10                   | 156.10                 | <0.001   |
| Mean difference in BIC with 95%CI limits‡ | 36.77 (0.90, 64.73)      |                        |          |
| NRI with 95%CI limits                     | 28.93% (9.35%, 46.75%)   |                        | <0.001   |
| IDI with 95%CI limits                     | 0.026 (0.002, 0.045)     |                        | 0.019    |
| <b>Validation cohort</b>                  |                          |                        |          |
| <b>Low grade</b>                          |                          |                        |          |
| Harrell's C index*                        | 0.671 (0.600-0.742)      | 0.707 (0.627-0.788)    | 0.041    |
| AIC†                                      | 379.78                   | 377.67                 | 0.348    |
| Likelihood ratio chi-square‡              | 15.69                    | 21.80                  | <0.001   |
| Mean difference in BIC with 95%CI limits‡ | -1.10 (-19.78, 9.03)     |                        |          |
| NRI with 95%CI limits                     | 35.55% (-32.14%, 75.73%) |                        | 0.548    |
| IDI with 95%CI limits                     | 0.041 (-0.067, 0.115)    |                        | 0.436    |
| <b>High grade</b>                         |                          |                        |          |
| Harrell's C index*                        | 0.626 (0.575-0.677)      | 0.658 (0.604-0.712)    | 0.044    |
| AIC†                                      | 789.85                   | 786.15                 | 0.157    |
| Likelihood ratio chi-square‡              | 16.17                    | 23.88                  | <0.001   |
| Mean difference in BIC with 95%CI limits‡ | -6.19 (-16.69, 9.05)     |                        |          |
| NRI with 95%CI limits                     | 47.34% (-19.19%, 78.57%) |                        | 0.441    |
| IDI with 95%CI limits                     | 0.042 (-0.036, 0.104)    |                        | 0.317    |

Abbreviations: AIC, Akaike information criterion; BIC, Bayesian information criteria; CI, Confidence interval; NRI, Net reclassification Index; IDI, Integrated discrimination improvement index.

Supplemental Table 6. Comparison of the Prognostic Performance of the AJCC 8th ypTNM Staging System and the Modified ypTNM Staging System for Patients with Different Histological Types.

| Variable                                  | ypTNM staging (AJCC 8th)  | Modified ypTNM staging | p value* |
|-------------------------------------------|---------------------------|------------------------|----------|
| <b>Development cohort</b>                 |                           |                        |          |
| <b>General types</b>                      |                           |                        |          |
| Harrell's C index*                        | 0.585 (0.565-0.605)       | 0.614 (0.593-0.635)    | <0.001   |
| AIC†                                      | 10465.85                  | 10417.61               | <0.001   |
| Likelihood ratio chi-square‡              | 87.84                     | 140.10                 | <0.001   |
| Mean difference in BIC with 95%CI limits# | 39.54 (4.27, 67.87)       |                        |          |
| NRI with 95%CI limits                     | 31.59% (9.90%, 39.47%)    |                        | <0.001   |
| IDI with 95%CI limits                     | 0.029 (0.009, 0.050)      |                        | <0.001   |
| <b>Special types</b>                      |                           |                        |          |
| Harrell's C index*                        | 0.588 (0.588-0.621)       | 0.621 (0.586-0.657)    | 0.004    |
| AIC†                                      | 3123.63                   | 3102.59                | <0.001   |
| Likelihood ratio chi-square‡              | 51.44                     | 76.48                  | <0.001   |
| Mean difference in BIC with 95%CI limits# | 15.09 (-11.04, 32.57)     |                        |          |
| NRI with 95%CI limits                     | 19.14% (-6.77%, 71.88%)   |                        | <0.001   |
| IDI with 95%CI limits                     | 0.030 (-0.012, 0.080)     |                        | 0.119    |
| <b>Validation cohort</b>                  |                           |                        |          |
| <b>General types</b>                      |                           |                        |          |
| Harrell's C index*                        | 0.656 (0.604-0.712)       | 0.692 (0.604-0.712)    | 0.040    |
| AIC†                                      | 884.09                    | 874.85                 | 0.010    |
| Likelihood ratio chi-square‡              | 27.29                     | 40.53                  | <0.001   |
| Mean difference in BIC with 95%CI limits# | 5.45 (-17.54, 17.95)      |                        |          |
| NRI with 95%CI limits                     | 48.47% (-10.35%, 76.88%)  |                        | 0.138    |
| IDI with 95%CI limits                     | 0.036(-0.040, 0.092)      |                        | 0.475    |
| <b>Special types</b>                      |                           |                        |          |
| Harrell's C index*                        | 0.583 (0.508-0.658)       | 0.622 (0.546-0.699)    | 0.046    |
| AIC†                                      | 389.19                    | 384.42                 | 0.092    |
| Likelihood ratio chi-square‡              | 4.13                      | 12.91                  | <0.001   |
| Mean difference in BIC with 95%CI limits# | 2.51 (-16.60, 11.32)      |                        |          |
| NRI with 95%CI limits                     | 57.81% (-21.11%, 116.49%) |                        | 0.201    |
| IDI with 95%CI limits                     | 0.064(-0.019, 0.133)      |                        | 0.198    |

Abbreviations: AIC, Akaike information criterion; BIC, Bayesian information criteria; CI, Confidence interval; NRI, Net reclassification Index; IDI, Integrated discrimination improvement index.



Supplemental Table 7. Multivariate Analyses for Overall Survival in the Development and the Validation Cohort (Including ypT and ypN category).

| Variable                  | Development cohort (n=1791) |           |        | Validation cohort (n=266) |            |        |
|---------------------------|-----------------------------|-----------|--------|---------------------------|------------|--------|
|                           | Multivariate Model          |           |        | Multivariate Model        |            |        |
|                           | HR                          | 95%CI     | p      | HR                        | 95%CI      | p      |
| <b>Age</b>                |                             |           |        |                           |            |        |
| <45                       | REF                         |           | <0.001 |                           |            |        |
| 45-59                     | 1.14                        | 0.91-1.42 | 0.262  |                           |            |        |
| 60-75                     | 1.27                        | 1.02-1.58 | 0.032  |                           |            |        |
| >75                       | 1.72                        | 1.32-2.26 | 0.000  |                           |            |        |
| <b>Race</b>               |                             |           |        |                           |            |        |
| White                     |                             |           |        |                           |            |        |
| Black                     |                             |           |        |                           |            |        |
| Others*                   |                             |           |        |                           |            |        |
| Unknown                   |                             |           |        |                           |            |        |
| <b>Site</b>               |                             |           |        |                           |            |        |
| Upper                     | REF                         |           | 0.004  |                           |            |        |
| Middle                    | 0.72                        | 0.60-0.87 | <0.001 |                           |            |        |
| Lower                     | 0.81                        | 0.66-0.99 | 0.038  |                           |            |        |
| Overlapping               | 0.80                        | 0.63-1.03 | 0.080  |                           |            |        |
| NOS                       | 0.95                        | 0.72-1.25 | 0.692  |                           |            |        |
| <b>Histological type</b>  |                             |           |        |                           |            |        |
| General types             | REF                         |           |        |                           |            |        |
| Special types             | 1.23                        | 1.07-1.42 | 0.005  |                           |            |        |
| <b>Size</b>               |                             |           |        |                           |            |        |
| ≤2cm                      |                             |           |        |                           |            |        |
| >2cm, ≤5cm                |                             |           |        |                           |            |        |
| >5cm                      |                             |           |        |                           |            |        |
| Linitis plastica          |                             |           |        |                           |            |        |
| Unknown                   |                             |           |        |                           |            |        |
| <b>Surgical procedure</b> |                             |           |        |                           |            |        |
| Partial gastrectomy       | REF                         |           | 0.011  |                           |            |        |
| Total gastrectomy         | 1.18                        | 1.03-1.36 | 0.020  |                           |            |        |
| Gastrectomy, NOS          | 1.25                        | 1.05-1.49 | 0.012  |                           |            |        |
| <b>Grade</b>              |                             |           |        |                           |            |        |
| Low                       | REF                         |           | 0.042  |                           |            |        |
| High                      | 1.16                        | 1.00-1.35 | 0.056  |                           |            |        |
| Gx                        | 0.90                        | 0.68-1.19 | 0.457  |                           |            |        |
| <b>ypT category</b>       |                             |           |        |                           |            |        |
| T1                        | REF                         |           | <0.001 | REF                       |            | 0.011  |
| T2                        | 1.35                        | 0.99-1.84 | 0.058  | 2.20                      | 0.90-5.36  | 0.084  |
| T3                        | 1.41                        | 1.08-1.86 | 0.013  | 1.58                      | 0.65-3.83  | 0.312  |
| T4a                       | 1.64                        | 1.24-2.16 | 0.001  | 2.59                      | 1.08-6.18  | 0.032  |
| T4b                       | 1.95                        | 1.40-2.71 | <0.001 | 3.93                      | 1.44-10.71 | 0.008  |
| <b>ypN category</b>       |                             |           |        |                           |            |        |
| N0                        | REF                         |           | <0.001 | REF                       |            | <0.001 |
| N1                        | 1.55                        | 1.29-1.85 | <0.001 | 1.15                      | 0.67-1.99  | 0.607  |
| N2                        | 1.99                        | 1.66-2.39 | <0.001 | 1.61                      | 0.97-2.69  | 0.068  |
| N3                        | 3.32                        | 2.73-4.04 | <0.001 | 2.95                      | 1.88-4.61  | <0.001 |
| <b>LN examined</b>        |                             |           |        |                           |            |        |
| <15                       | REF                         |           |        |                           |            |        |
| ≥15                       | 0.67                        | 0.59-0.77 | <0.001 |                           |            |        |

All significantly important prognostic factors in univariate analysis were considered in multivariate analyses, except for AJCC 8th ypTNM staging and the modified ypTNM staging.

Abbreviations: NOS, not otherwise specified; LNs, Lymph nodes; Gx, Grade can't evaluate; NA, Not applicable.

Others\*, American Indian/AK Native, Asian/Pacific Islander.
